# Supplementary material for: Root transcriptome of two contrasting indica rice cultivars uncovers regulators of root development and physiological responses
Source: PubMed Central journal article supplement (PMC5175279; doi:10.1038/srep39266), 2016-12-21
Supplement: srep39266-s1.pdf [file srep39266-s1.pdf]

**Title:**

**Root transcriptome of two contrasting *indica* rice cultivars uncovers regulators of root development and physiological responses**

**Running title:**

**Molecular regulation of rice root architecture**

**Authors:**

Alka Singh<sup>\$1</sup>, Pramod Kumar<sup>\$1</sup>, Vibhav Gautam<sup>1</sup>, Balakrishnan Rengasamy<sup>1</sup>, Bijan Adhikari<sup>2</sup>, Makarla Udayakumar<sup>3</sup> and Ananda K. Sarkar\*<sup>1</sup>

<sup>\$</sup>These authors have contributed equally.

**Affiliation:**

<sup>1</sup>National Institute of Plant Genome Research, Aruna Asaf Ali Marg, New Delhi 110067, India.

<sup>2</sup>Dr. Bijan Adhikari, Rice Research Station, Chinsurah, West Bengal 712101, India.

<sup>3</sup>Department of Crop Physiology, University of Agricultural Sciences, GKVK, Bangalore 560065, India

## Supplemental figures

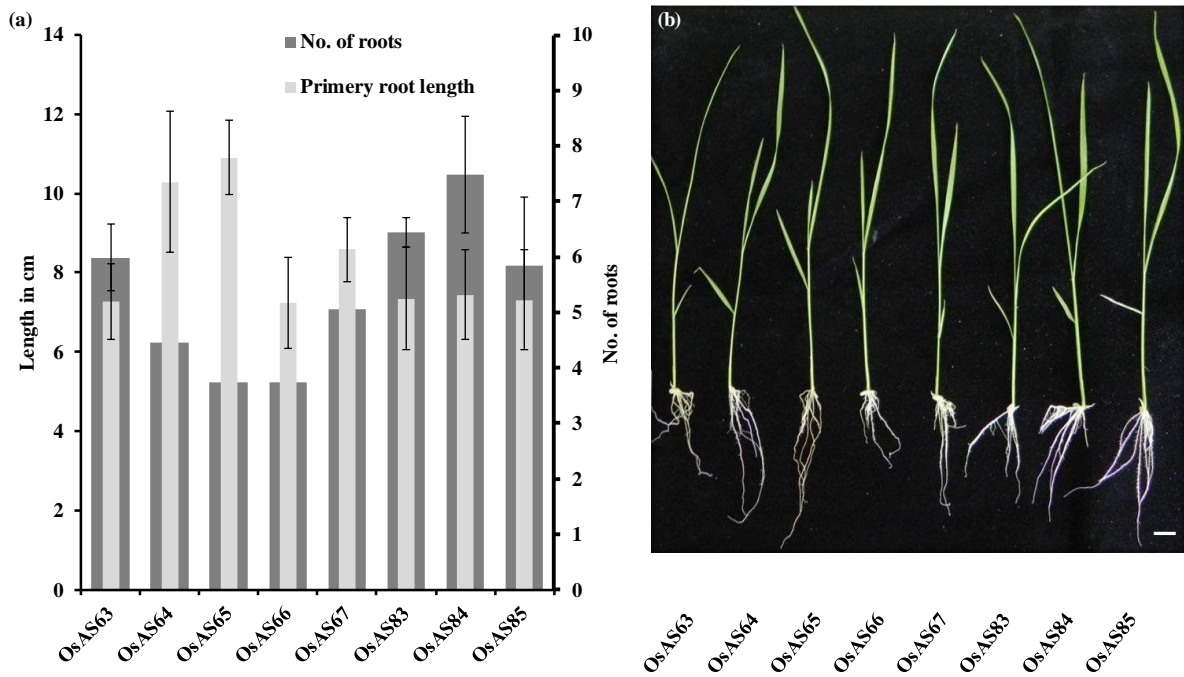

### Supplemental figure S1. Growth assay of various rice cultivars.

(a-b) Growth assay of various rice cultivars in hydroponics medium at 14 dag (n = 10). Scale bar 1 cm.

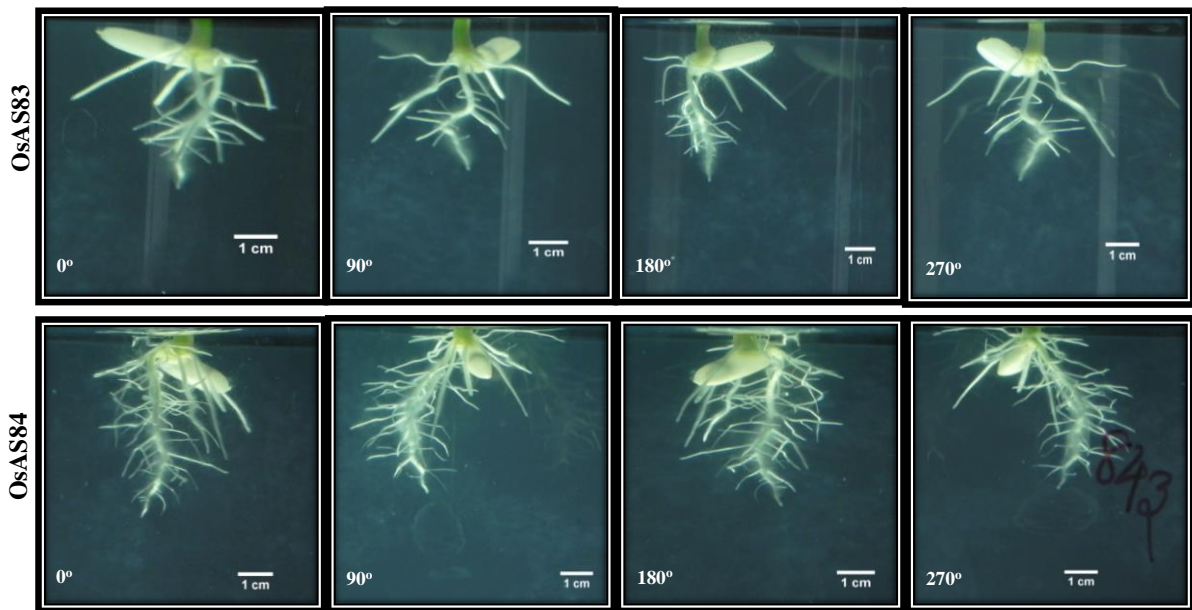

**Supplemental figure S2. Visualization of OsAS84 and OsAS83 at differ angles.**

To visualize the RSA, plants were grown in hydroponic medium for 7 days. Pictures were captured at different angle. Scale bar 1 cm. OsAS84 shows high root density than OsAS83.

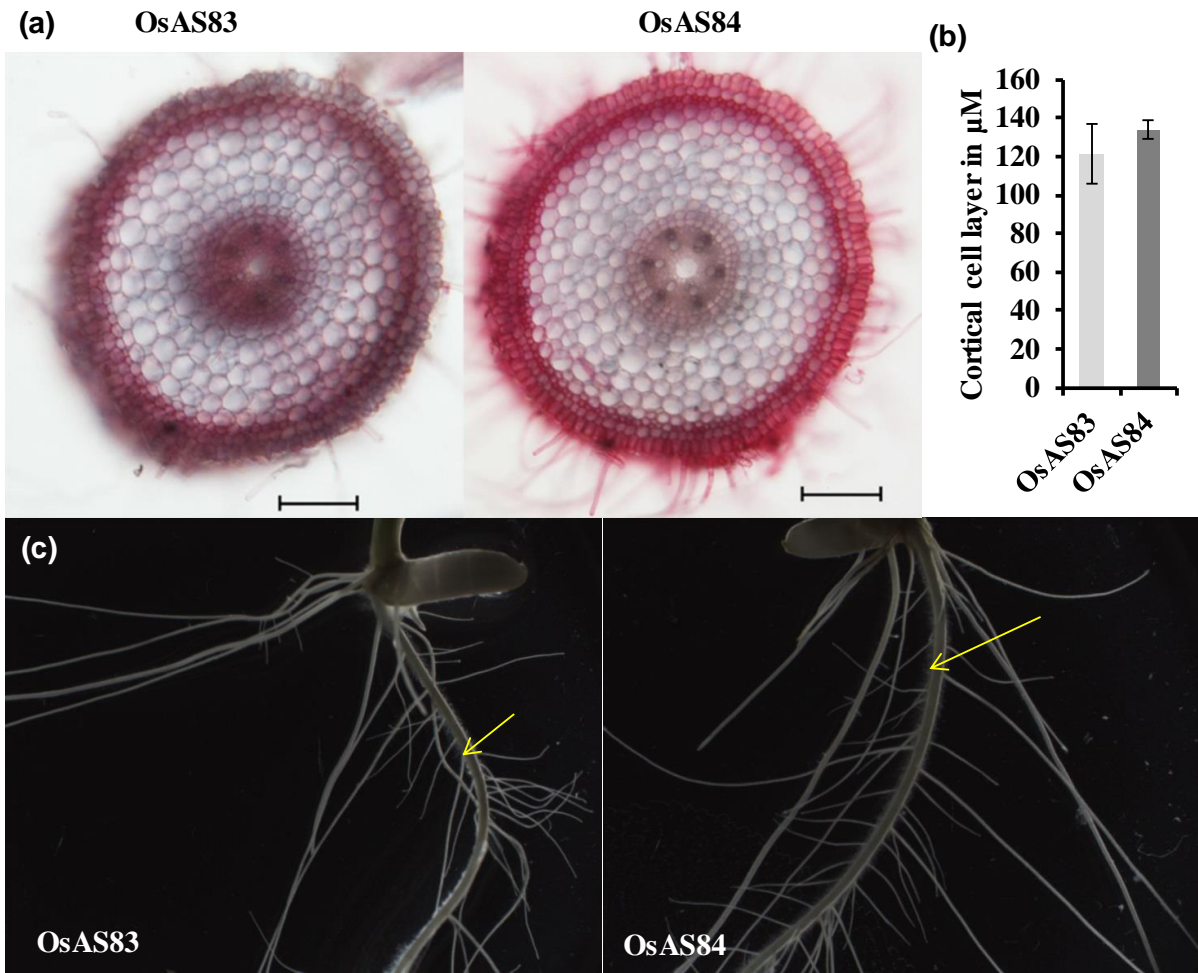

**Supplemental figure S3. OsAS84 and OsAS83 differ in their histological characters.**

(a) Transverse sections of 2 days old root from 1 cm of root tip. Images shown are representative of at least 10 sections. Scale bar 100  $\mu\text{m}$ . (b) Measurement of cortical layer in OsAS83 and OsAS84. Error bar represent standard error (n = 10). (c) Enlarge view of OsAS83 and OsAS84 root of 5 dag. Arrow indicates root hair density.

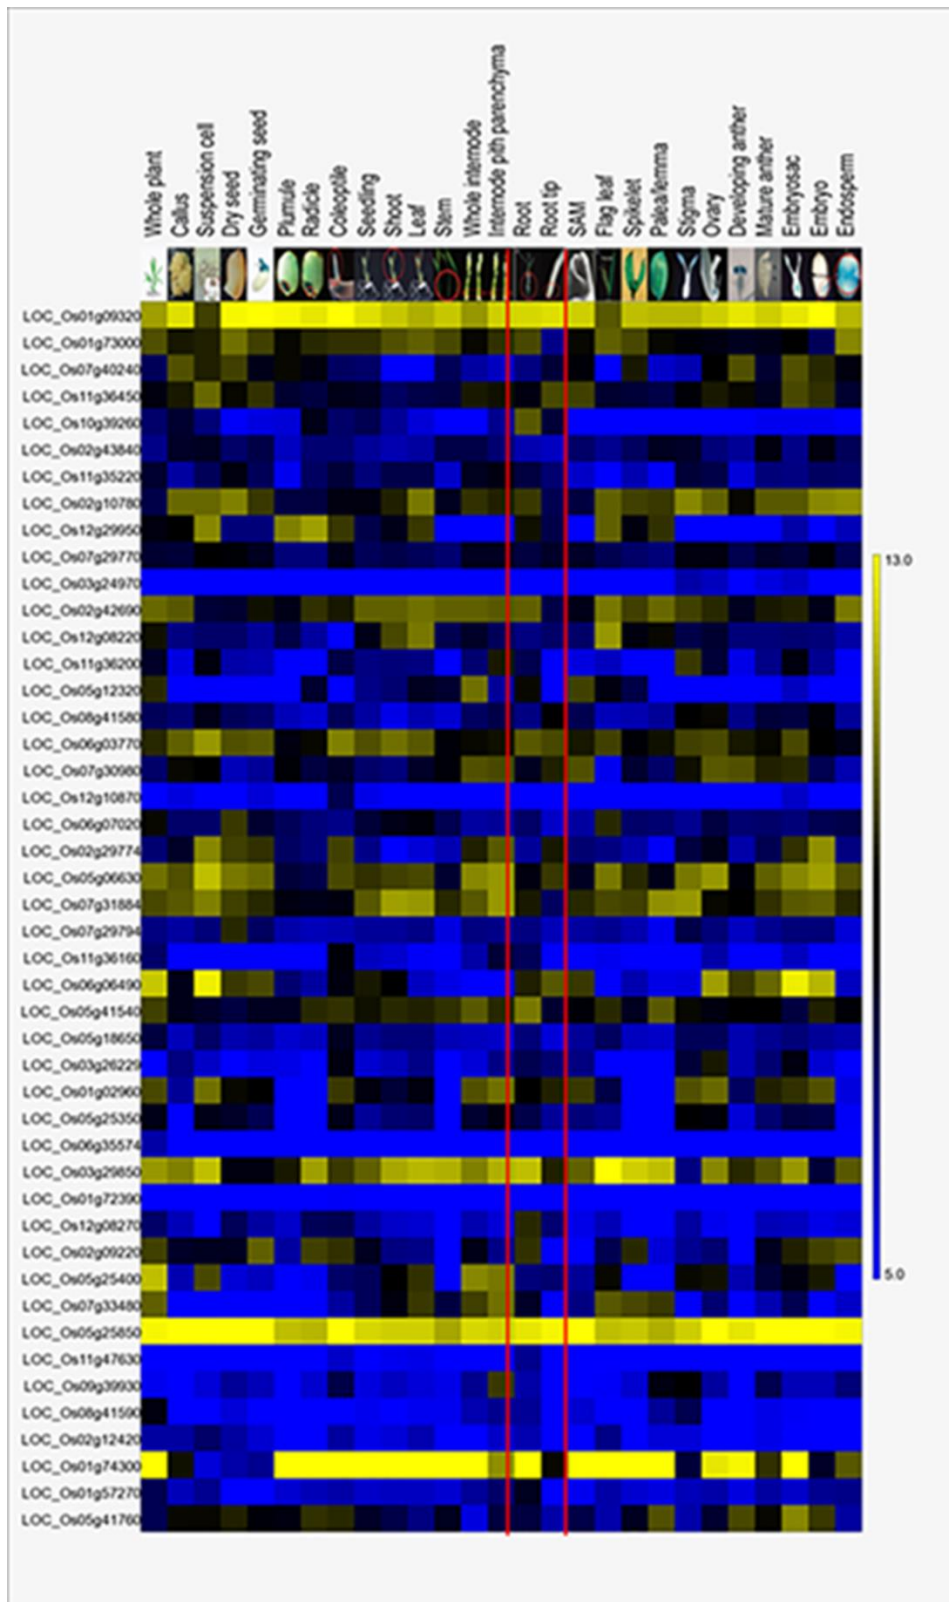

**Supplemental figure S4. *In silico* expression profiling of selected genes in different anatomical stages of rice.**

Validated genes were analyzed *in silico* for their tissue specific expression by Rice Oligonucleotide Array DataBase (<http://www.ricearray.org>).

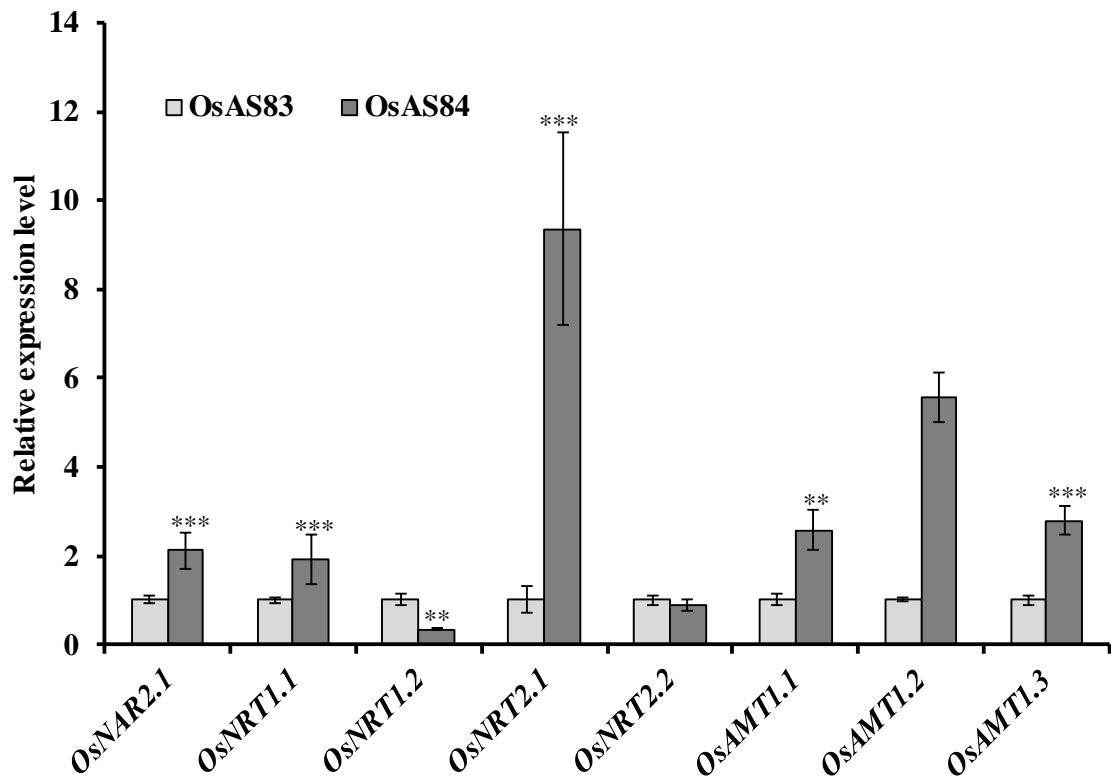

**Supplemental figure S5. Nitrate and ammonium transporters showed increased expression in OsAS84 in N sufficient (normal) condition.**

Expression analysis of nitrogen and ammonium transporters in root of OsAS83 and OsAS84. Rice seedlings were germinated for 3 days on wet paper and transferred to hydroponics medium. Root samples were harvested after 7 days. Mean of three independent biological replicate was plotted. Error bars indicate SE (n = 3). Asterisks indicate significant statistical differences, \*\*\*P < 0.001, \*\*P < 0.01, \*P < 0.05 (One-way Anova).

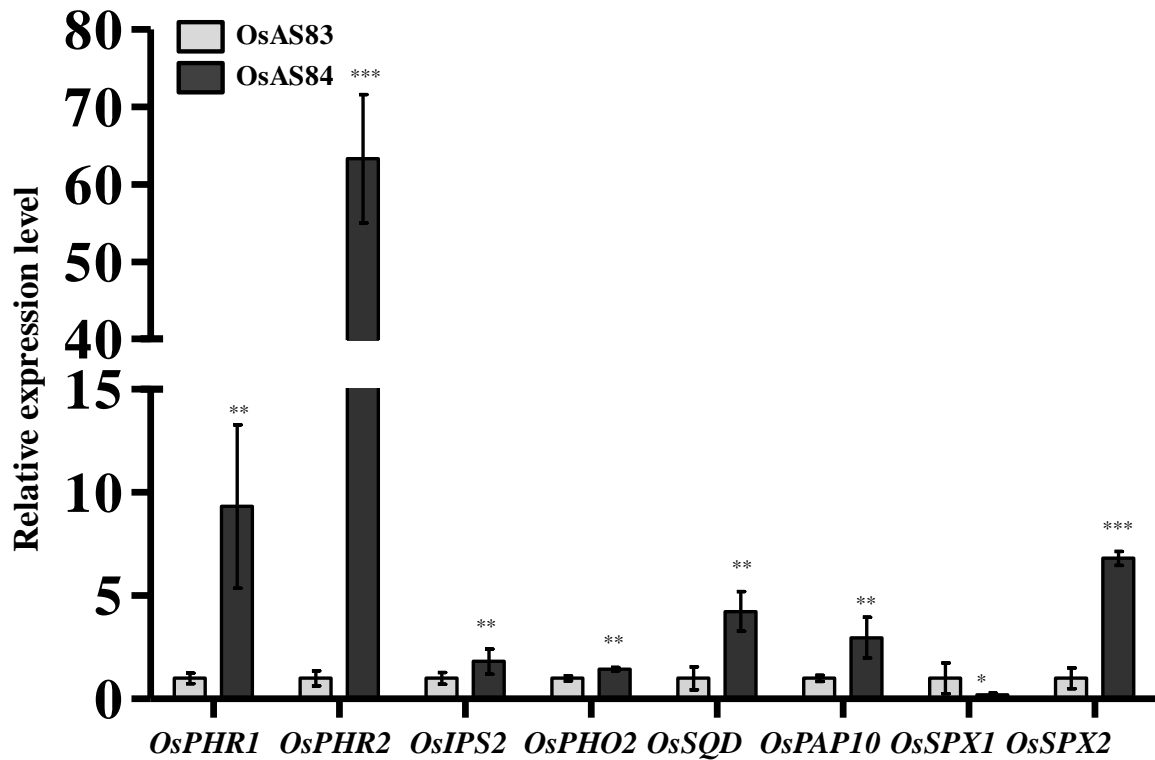

**Supplemental figure S6. Phosphate starvation- inducible genes (PSI) showed increased expression in OsAS84 in Pi sufficient (normal) condition.**

Expression analysis of PSI genes in root of OsAS83 and OsAS84. Rice seedlings were germinated for 3 days on wet paper and transferred to hydroponics medium. Root samples were harvested after 7 days. Mean of three independent biological replicate was plotted. Error bars indicate SE (n = 3). Asterisks indicate significant statistical differences, \*\*\*P < 0.001, \*\*P < 0.01, \*P < 0.05 (One-way Anova).

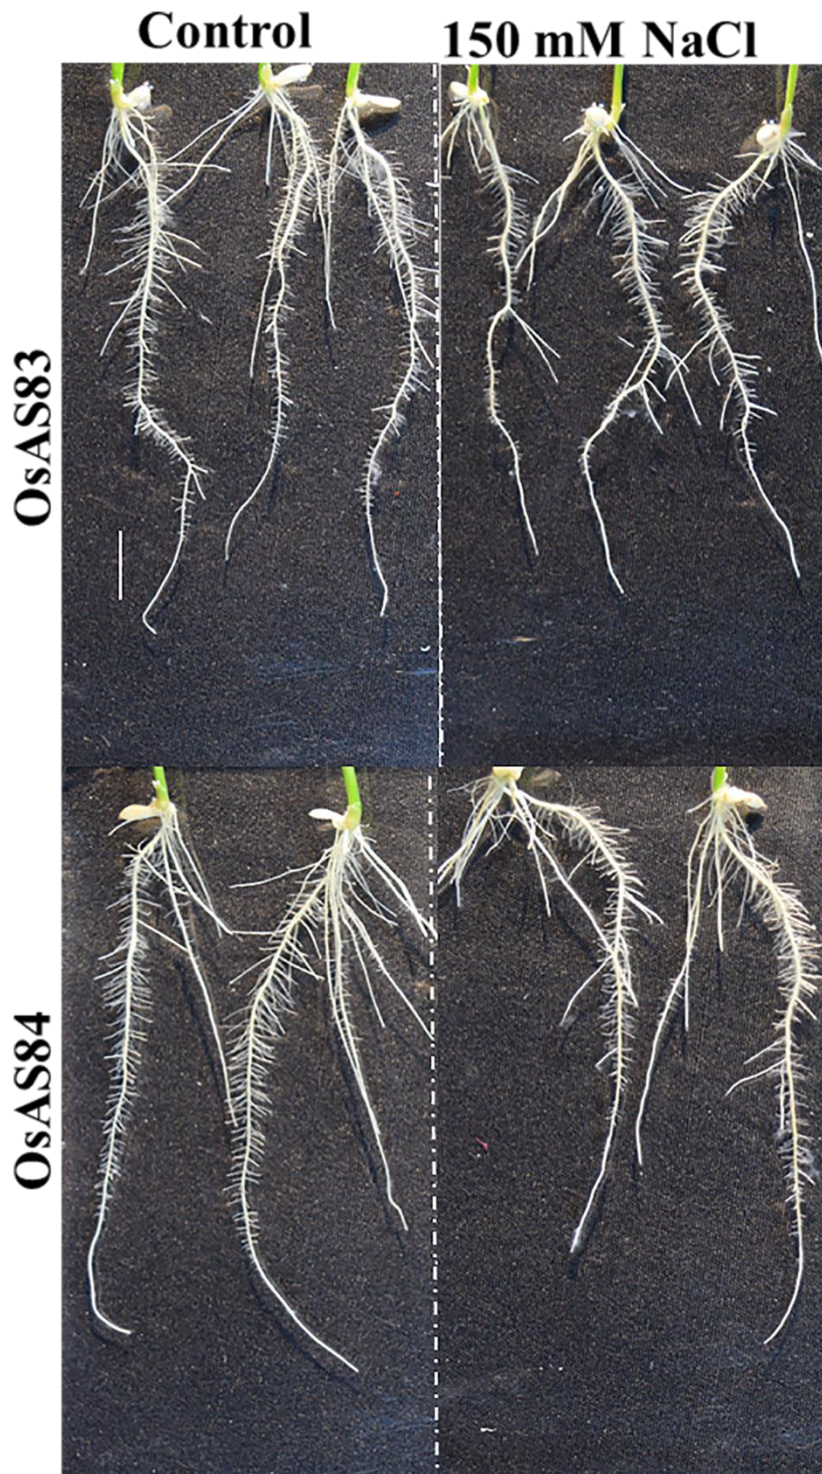

**Supplemental figure S7. OsAS83 and OsAS84 showed variation in root growth on salinity stress.**

Enlarge view of root of OsAS83 and OsAS84 after treatment of NaCl.

Rice seedlings were germinated for 3 days on wet paper and transferred to hydroponics medium containing 150 mM NaCl. Root samples were harvested after 7 days. Scale bar 1 cm.



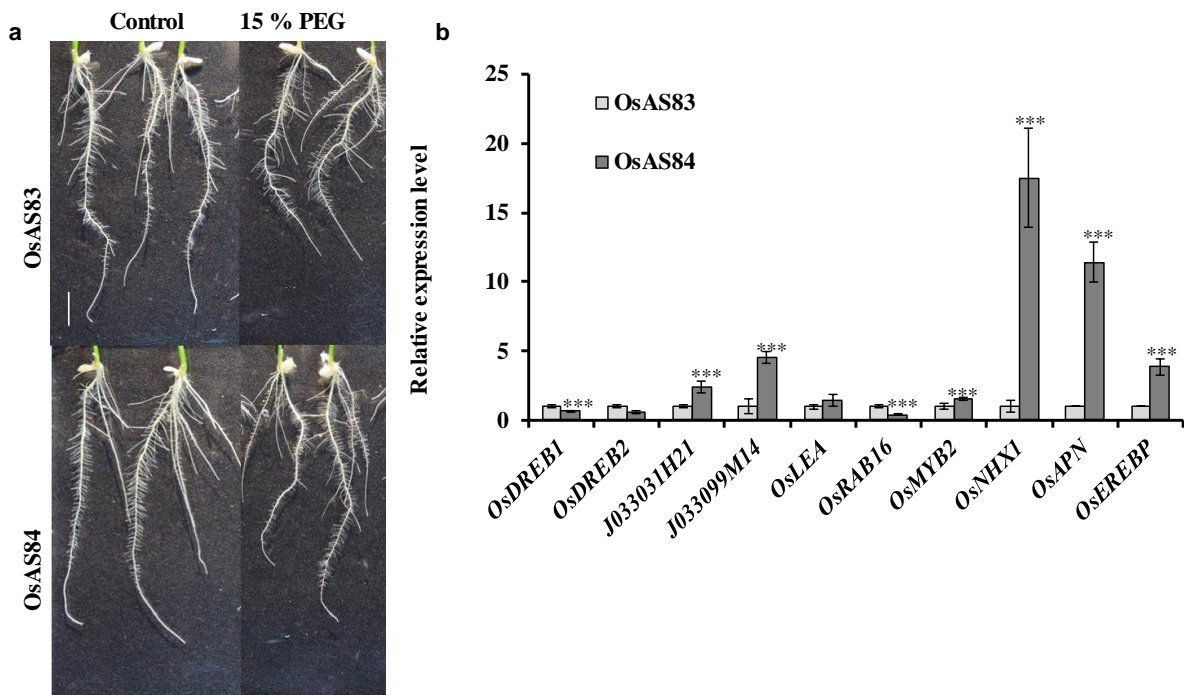

**Supplemental figure S8.** OsAS83 and OsAS4 showed differential phenotypic variation in root morphology under dehydration stress.

(a) Enlarge view of root of OsAS83 and OsAS84 after treatment of PEG. Rice seedlings were germinated for 3 days on wet paper and transferred to hydroponics medium containing 15% PEG 6000. Root samples were harvested after 7 days. Scale bar 1 cm. (b) Expression analysis of dehydration responsive genes in normal conditions. Mean of three independent biological replicate was plotted. Error bars indicate SE (n = 3). Asterisks indicate significant statistical differences, \*\*\*P < 0.001, \*\*P < 0.01, \*P < 0.05 (One-way Anova).

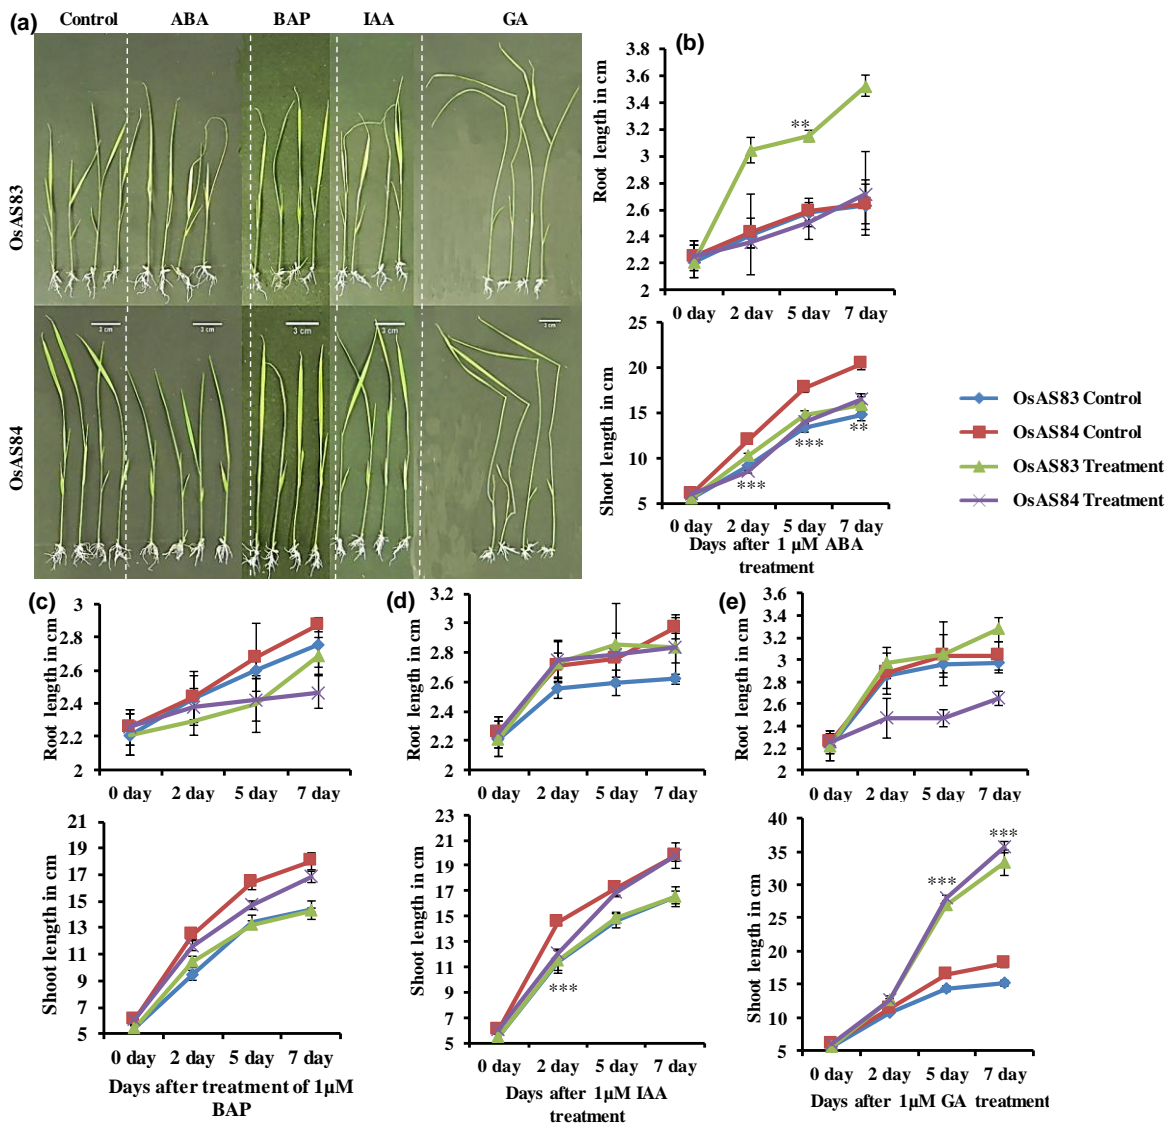

### Supplemental figure S9. Phytohormones treatment leads to altered root and shoot morphology.

Rice seedlings were germinated for 3 days on wet paper and transferred to hydroponics medium containing 1  $\mu$ M ABA, 1  $\mu$ M BAP, 1  $\mu$ M IAA and 1  $\mu$ M GA. Root samples were harvested at 0, 2, 5 and 7 days. (a) Phenotype of OsAS83 and OsAS84 seedlings after treatment with phytohormones. Scale bar 1 cm. (b) Primary root length and shoot length after treatment of 1  $\mu$ M ABA. (c) Primary root length and shoot length after treatment of 1  $\mu$ M BAP. (d) Primary root length and shoot length after treatment of 1  $\mu$ M IAA. (e) Primary root length and shoot length after treatment of 1  $\mu$ M GA. In b-e, error bars represent standard error (n=10). Experiment repeated 3 times with similar results. Asterisks indicate significant statistical differences, \*\*\*P<0.001, \*\*P<0.01, \*P<0.05 (One-way Anova).

**Table S1. List of validated genes by real time qRT-PCR.**

| Gene Id          | FC in Real time qRT-PCR | FC in microarray | Putative function                                   |
|------------------|-------------------------|------------------|-----------------------------------------------------|
| LOC_Os07g29794   | 110.5276525             | 2.8709397        | Calmodulin binding heat shock protein, putative,    |
| LOC_Os02g09220.1 | 69.76763704             | 8.314912         | Cytochrome P450                                     |
| LOC_Os05g18650   | 27.83658991             | 9.414617         | Expressed protein                                   |
| LOC_Os06g35574.1 | 25.84187264             | 2.4708936        | mki67 protein, putative, expressed                  |
| LOC_Os06g30920   | 8.14923581              | 5.000838         |                                                     |
| LOC_Os03g24970   | 5.731105462             | 3.0067194        | SWIM zinc finger family protein                     |
| LOC_Os02g43840   | 3.244021143             | 4.617959         | EREBP-4 like protein                                |
| LOC_Os11g35220   | 3.23464264              | 5.0498934        | OsWAK117 - OsWAK receptor-like cytoplasmic kinase   |
| LOC_Os05g06630   | 3.118850356             | 16.080547        | Serine peptidase, protein binding                   |
| LOC_Os12g08270.1 | 3.066393829             | 3.2962341        | Inositol-1-monophosphatase                          |
| LOC_Os01g73000   | 2.318126223             | 53.4             | Response to oxidative stress, peroxidase            |
| LOC_Os12g29950   | 1.904615928             | 2.4              | Nitrate Chloride transporter                        |
| LOC_Os03g29850   | 1.884653866             | 2.7012017        | Metal Cation transporter                            |
| LOC_Os10g39260   | 1.757361508             | 5.4163294        | Aspartic proteinase nepenthesin                     |
| LOC_Os07g31884   | 1.718261814             | 2.2769732        | MATE efflux ALF5                                    |
| LOC_Os01g72390.1 | 1.589937991             | 6.5760393        | NBS type disease resistance protein                 |
| LOC_Os02g10780   | 1.398431577             | 6.11331          | SPX domain containing protein                       |
| LOC_Os01g09320   | 1.271756759             | 15.6             | NADP-dependent malic enzyme                         |
| LOC_Os02g29774   | 1.170207741             | 12.615214        | N/A                                                 |
| LOC_Os02g42690   | 1.141915757             | 3.7169807        | Zinc finger, C3HC4 type domain containing protein   |
| LOC_Os12g08220   | 1.138394117             | 2.1608307        | Arabidopsis Thaliana Histone Deacetylase 14 (Hda14) |
| LOC_Os07g29770   | 1.100331237             | 2.1135173        | Zinc finger protein, putative                       |
| LOC_Os09g39930.1 | -1.027619995            | -2.620259        | Tyrosine protein kinase                             |
| LOC_Os05g41540   | -1.06650036             | -2.7472656       | bZIP transcription factor domain containing protein |
| LOC_Os02g12420.1 | -1.178953105            | -7.7848024       | Receptor-like protein kinase precursor              |
| LOC_Os12g10870   | -1.20437027             | -5.047916        | Verticillium wilt disease resistance protein        |
| LOC_Os05g12320   | -1.225378218            | -2.959296        | Nodulin MtN3 family protein                         |
| LOC_Os08g41580   | -1.377060129            | -4.853546        | Ubiquitin carboxyl-terminal hydrolase               |
| LOC_Os07g33480.1 | -1.413563692            | -3.5746381       | Cytochrome P450 domain containing protein           |
| LOC_Os05g25400.1 | -1.422277195            | -20.296616       | RNA binding protein, ribonuclease III activity      |
| LOC_Os06g07020   | -1.490540594            | -2.8766186       | ZOS6-01 - C2H2 zinc finger protein                  |
| LOC_Os11g47630.1 | -1.517556133            | -2.201833        | ZOS11-10 - C2H2 zinc finger protein                 |
| LOC_Os11g36450   | -1.736024455            | -6.1             | OsFBO15 - F-box and other domain containing protein |
| LOC_Os07g40240   | -1.896348031            | -5.9             | GASR9- GASA/GAST/Snakin family protein              |

|                  |              |            |                                            |
|------------------|--------------|------------|--------------------------------------------|
| LOC_Os07g30980   | -1.972235883 | -4.069508  | uvrD/REP Helicase family protein           |
| LOC_Os01g02960.1 | -2.410204319 | -15.232705 | Expressed protein                          |
| LOC_Os08g41590.1 | -2.43270618  | -6.2401733 | Peptide transporter PTR2                   |
| LOC_Os01g74300.1 | -2.515950627 | -2.2411637 | Metallothionein                            |
| LOC_Os05g25850.1 | -2.762260832 | -2.3229039 | Superoxide dismutase                       |
| LOC_Os05g25350.1 | -2.945038074 | -22.431421 | N/A                                        |
| LOC_Os06g03770   | -3.610416363 | -2.0081406 | ABC transporter                            |
| LOC_Os05g41760.1 | -3.774301482 | -2.0487518 | AP2 domain containing protein              |
| LOC_Os05g25650   | -3.881953183 | -51.846687 | N/A                                        |
| LOC_Os11g36200   | -4.953760087 | -70.49862  | Receptor-like protein kinase 2             |
| Rice OS.15501.1  | -7.365138316 | -27.63895  |                                            |
| LOC_Os03g26229   | -10.71443933 | -12.657807 |                                            |
| LOC_Os01g57270.1 | -34.4835066  | -10.562866 | Disease resistance RPP13-like protein 1    |
| LOC_Os11g36160   | -44.75860868 | -19.131111 | Receptor-like protein kinase 2 precursor   |
| LOC_Os06g06490   | -81.01512963 | -21.283022 | U-box domain containing heat shock protein |

**Table S2.** List of primers used in study

| <b>A. List of primes used for validation of microarray by qRT-PCR</b> |                  |                                  |
|-----------------------------------------------------------------------|------------------|----------------------------------|
| <b>S.No.</b>                                                          | <b>Gene Id</b>   | <b>Forward primer (5' to 3')</b> |
| 1                                                                     | LOC_Os01g09320_F | GCCTCGGTGTTGTAATCTCTG            |
| 2                                                                     | LOC_Os01g09320_R | GATCCCTTCTCAAAGTTCTCCTG          |
| 3                                                                     | LOC_Os01g73000_F | TTCTTGAGAACGACAACGCTG            |
| 4                                                                     | LOC_Os01g73000_R | GTTAAGCAGATTGGGCAAAC             |
| 5                                                                     | LOC_Os07g40240_F | TTCCAGGATCTCACCGTCG              |
| 6                                                                     | LOC_Os07g40240_R | CCACCTTCAGCGAGCAC                |
| 7                                                                     | LOC_Os11g36450_F | GTGGCATTGGTTATCAATCTGG           |
| 8                                                                     | LOC_Os11g36450_R | CACTTGCATTGGGCCTCTT              |
| 9                                                                     | LOC_Os10g39260_F | CGCCGTTTCGTC AACATCTC            |
| 10                                                                    | LOC_Os10g39260_R | AGCCCTTCGAGTTGGACCTT             |
| 11                                                                    | LOC_Os02g43840_F | GGGTGAATCGGCTAGCAAGA             |
| 12                                                                    | LOC_Os02g43840_R | ACGCCAACAGGAGAAACCT              |
| 13                                                                    | LOC_Os11g35220_F | CGGAATGGTGGACATGAAAAA            |
| 14                                                                    | LOC_Os11g35220_R | GAACAATGACCCAAAAGTTTGATG         |
| 15                                                                    | LOC_Os02g10780_F | TCTACAAGCTCGTGAAGGAATGC          |
| 16                                                                    | LOC_Os02g10780_R | CCCCTTCGCTGTCATCTTTC             |
| 17                                                                    | LOC_Os12g29950_F | TTCGTTGTGTCGGTGTGTTGG            |
| 18                                                                    | LOC_Os12g29950_R | GCGTAGTTCCAGATGCTGATGA           |
| 19                                                                    | LOC_Os07g29770_F | CAACTATCGCACCTCCAAACCT           |
| 20                                                                    | LOC_Os07g29770_R | CAAACACCGCAAGCTGATGT             |
| 21                                                                    | LOC_Os03g24970_F | AGACATAGCAAAGTCAAAGGGAAGA        |
| 22                                                                    | LOC_Os03g24970_R | TCGTTGACAATGACTGCAATGA           |
| 23                                                                    | LOC_Os02g42690_F | ACTACACGAGCCCTTACCACATG          |

|    |                   |                             |
|----|-------------------|-----------------------------|
| 24 | LOC_Os02g42690_R  | GCGAACACGACAAGGAAGAAC       |
| 25 | LOC_Os12g08220_F  | TGTGTCTTTGGGAACATTGCA       |
| 26 | LOC_Os12g08220_R  | CGTTACCGTGGTGAACATCAA       |
| 27 | LOC_Os11g36200_F  | GGAGAGACATTGCGAGAAGGA       |
| 28 | LOC_Os11g36200_R  | ACAGTGAGAAGCAGGACAATGC      |
| 29 | LOC_Os05g12320_F  | ATGACTGTGTTTTTCTCAAGCTTTTC  |
| 30 | LOC_Os05g12320_R  | AGCCGTACATTGATATGGAAGACA    |
| 31 | LOC_Os08g41580_F  | CGCAGTTCGAGGCATTG           |
| 32 | LOC_Os08g41580_R  | CCCTCCATTTCCTTTCATCCT       |
| 33 | LOC_Os06g03770_F  | TGCTGCACTGAAAACCCAAA        |
| 34 | LOC_Os06g03770_R  | CCGTGGATAAAGCCGAGCTA        |
| 35 | LOC_Os07g30980_F  | CTGGCTTTGATTTCATTTTCGTAGAG  |
| 36 | LOC_Os07g30980_R  | TGCCCGTGTAGAGCGATAGTT       |
| 37 | LOC_Os12g10870_F  | ATTGAGGACCCTTATGCTGATTG     |
| 38 | LOC_Os12g10870_R  | GTACAAGCCCCCGACAGT          |
| 39 | LOC_Os06g07020_F  | AAGCGCCAGGTGAAGCATT         |
| 40 | LOC_Os06g07020_R  | GTGTCGGTCAAATCGGAGTCA       |
| 41 | LOC_Os06g30920_F  | ACCCCCTGTTCCCTCATTTGTG      |
| 42 | LOC_Os06g30920_R  | CGTGGACGAGAATCGAATTATG      |
| 43 | LOC_Os02g29774_F  | CATCAGTGAAGTCTTTTCAGGTACTTG |
| 44 | LOC_Os02g29774_R  | AAGTGAGATCATGTCGTGCAACA     |
| 45 | LOC_Os05g06630_F  | CGTCACGCTCTTCACTTACTTCA     |
| 46 | LOC_Os05g06630_R  | TATCAACCGTCCCTGCACAA        |
| 47 | LOC_Os05g25650_F  | GCCTGCGAAAACCGGATT          |
| 48 | LOC_Os05g25650_R  | CGCAAATAAAGGAAACATACTGGTA   |
| 49 | Rice OS.15501.1_F | AGCTGCTACTGTCCCTTCCTGTA     |
| 50 | Rice OS.15501.1_R | GCGACAGATGCCTCTTTCCT        |
| 51 | LOC_Os07g31884_F  | TGCCGCTCTCCATCTTCTTC        |
| 52 | LOC_Os07g31884_R  | TGTCAGCCCGCAGATCAAA         |
| 53 | LOC_Os07g29794_F  | TTTGATGCTGGAGAACGAGAGA      |
| 54 | LOC_Os07g29794_R  | CGCCTTCTGCTCCTCATCAT        |
| 55 | LOC_Os11g36160_F  | TGCGTCATCGGAATCTTGTC        |
| 56 | LOC_Os11g36160_R  | CCGTTGGGCATGAAGTCATA        |
| 57 | LOC_Os06g06490_F  | CCAGCGACATCTCCTTCTTGA       |
| 58 | LOC_Os06g06490_R  | CCCTCACGCACTCCTGGTA         |
| 59 | LOC_Os05g41540_F  | GTGCCTGATAGCTTCGATGATTT     |
| 60 | LOC_Os05g41540_R  | GACGGACCAGGAGGATTGC         |
| 61 | LOC_Os05g18650_F  | CAAGGGCAATTTACAGCTTTGG      |
| 62 | LOC_Os05g18650_R  | TCCCTTGCCCCTCTCAGTT         |
| 63 | LOC_Os03g26229_F  | CCGCCTCCAGACCATTGT          |
| 64 | LOC_Os03g26229_R  | TGTGGCATTGCCTGATGAGT        |
| 65 | LOC_Os01g02960_F  | CTGTCCCTCAGCGTCAACGAA       |
| 66 | LOC_Os01g02960_R  | CCAAGACTGTCCCCGAACTC        |
| 67 | LOC_Os05g25350_F  | CAAAGTGTCTCAGGCAGCAAA       |
| 68 | LOC_Os05g25350_R  | TCTGTGTGGATGGGAAAAGG        |
| 69 | LOC_Os06g35574_F  | CACGGACAGCAAGCTCTTC         |

|     |                  |                          |
|-----|------------------|--------------------------|
| 70  | LOC_Os06g35574_R | TTAGTTGGCTCCACATGTCATC   |
| 71  | LOC_Os03g29850_F | ACCGGCATCTTCATCTACGT     |
| 72  | LOC_Os03g29850_R | AGGTGTCCCAGATCATGACG     |
| 73  | LOC_Os03g29850_F | GAGGAGCTGGCGGATGTGT      |
| 74  | LOC_Os03g29850_R | CCACAAACGCACAGGGAAGT     |
| 75  | LOC_Os12g08270_F | TGCAGCAGGACCTCTTGAAA     |
| 76  | LOC_Os12g08270_R | TCCATAATCGGGCGACTGTCA    |
| 77  | LOC_Os02g09220_F | GGTGGACATGATGGAGGAGT     |
| 78  | LOC_Os02g09220_R | CGACATAGGCACACGAACAG     |
| 79  | LOC_Os05g25400_F | AAGCCCCGTTTCGCTCTACA     |
| 80  | LOC_Os05g25400_R | TGCTCAGTGGTGGAAAGAAGAA   |
| 81  | LOC_Os07g33480_F | CCCATCCTCCTCCACCTTGT     |
| 82  | LOC_Os07g33480_R | ACGAATGGGAAGCCAAGTGA     |
| 83  | LOC_Os05g25850_F | ACCTACGTCGCCAACTACAA     |
| 84  | LOC_Os05g25850_R | TTGAACTTGATGGCGCTCTG     |
| 85  | LOC_Os11g47630_F | CATGTGCGGCAAGGTGTT       |
| 86  | LOC_Os11g47630_R | TGTGCCATTACGACTCACCA     |
| 87  | LOC_Os09g39930_F | CAGGGACAACAACAGCAACC     |
| 88  | LOC_Os09g39930_R | CTTGTGCCGGTAAGTCACTG     |
| 89  | LOC_Os08g41590_F | CGGCCACCTCGACTACTTCTAC   |
| 90  | LOC_Os08g41590_R | ACTGGTGTGTTGATGGTACAAGCA |
| 91  | LOC_Os02g12420_F | GTTCTAATCAGCTGGCAGGC     |
| 92  | LOC_Os02g12420_R | TTTGCAGCGATGGTATGCTC     |
| 93  | LOC_Os01g74300_F | GATGCAAGTACTCTGAGGTGG    |
| 94  | LOC_Os01g74300_R | CAGCACCAGACCCCTTG        |
| 95  | LOC_Os01g57270_F | TGTCCAATTTGCGCCCTAAG     |
| 96  | LOC_Os01g57270_R | TGGGTGCTGTGACCATAAGT     |
| 97  | LOC_Os05g41760_F | ATGGAGCTGGACATGGGAG      |
| 98  | LOC_Os05g41760_R | ACACCCGCGTCTTCTTCCA      |
| 99  | LOC_Os03g50885_F | GAAGTACAGTGTCTGGATTGGAG  |
| 100 | LOC_Os03g50885_R | CGTACTCAGCCTTGGCAATC     |
| 101 | LOC_Os08g03290_F | GGAAAGCTCAAGGGAATCATAGG  |
| 102 | LOC_Os08g03290_R | TTAAGAGCAATTCCAGCCTTGG   |

**B. List of primes of dehydration responsive genes**

| S.No | Name            | Primer 5' to 3'             |
|------|-----------------|-----------------------------|
| 1    | OsMYB2 RT_F     | GGGCTGAAACGCACAGGCAAGA      |
| 2    | OsMYB2 RT_R     | CTGCTTGGCGTGCTTCTGC         |
| 3    | J033099M14 RT_F | CTCAAATCAAGGCGTCAACTAAGA    |
| 4    | J033099M14 RT_R | TTGTCAATATATACGTGGCATATACCA |
| 5    | J033031H21 RT_F | CGCCCCTCCCCGTATCT           |
| 6    | J033031H21 RT_R | AGGAATGCGGCAACAAGTG         |
| 7    | OsNHX1 RT_F     | ACACGACCTCCGACTAC           |
| 8    | OsNHX1 RT_R     | TCATTGACCCAGCGATT           |
| 9    | OsLEA RT_F      | CGGCAGCGTCTCCAAC            |
| 10   | OsLEA RT_R      | CGGTCATCCCAGCGTG            |
| 11   | OsDERB2A RT_F   | GCTGCACATCAGCACCTTCA        |

| 12                                                            | OsDERB2A RT_R | TCCTGCACCTCAGGGACTAC      |
|---------------------------------------------------------------|---------------|---------------------------|
| 13                                                            | OsRAB16A RT_F | CACACCACAGCAAGAGCTAAGTG   |
| 14                                                            | OsRAB16A RT_R | TGGTGCTCCATCCTGCTTAAG     |
| 15                                                            | OsDREB1A RT_F | CATGGCCGGTGAACCTTGAC      |
| 16                                                            | OsDREB1A RT_R | CTCGTCGTCGTTTCAGTCCAG     |
| <b>C. List of primes of Phosphate starvation induce genes</b> |               |                           |
| 1                                                             | OsSPX1 RT_F   | GACCAGCTTCTACCATCAAACG    |
| 2                                                             | OsSPX1 RT_R   | AGTTCCTGCTGCTCCTCTGG      |
| 3                                                             | OsPHO2 RT_F   | GGCTATCGGAACTTATGG        |
| 4                                                             | OsPHO2 RT_R   | AAGAAGGCAGAGGAGGTATC      |
| 5                                                             | OsPHR1 RT_F   | CACAAGAAGGGAAAACCTACCGATG |
| 6                                                             | OsPHR1 RT_R   | TCAAGATTCATGCACTCTACGACGC |
| 7                                                             | OsPHR2 RT_F   | CGCTTTGTAGATGCTGTCAATC    |
| 8                                                             | OsPHR2 RT_R   | AGACCCTCATCACATCCTCATTATC |
| 9                                                             | OsIPS2 RT_F   | CCT TCTTCTGGATTCTCTC      |
| 10                                                            | OsIPS2 RT_R   | AGTTCACCACAAAAGATACAGTAG  |
| 11                                                            | OsSQD RT_F    | CTGAAAACGGTAATGGATAGG     |
| 12                                                            | OsSQD RT_R    | AACACCACCAGCACGAGC        |
| 13                                                            | OsPAP RT_F    | ATACTGGCAGCCGACGGATGA     |
| 14                                                            | OsPAP RT_R    | GAGGGAGCTGGAGCGGAGAA      |
| <b>D. List of primes of nitrogen and ammonium transporter</b> |               |                           |
| S.No                                                          | Name          | Primer 5' to 3'           |
| 1                                                             | OsNAR2.1 RT_F | CAAGGACAAGGCGTGCCAG       |
| 2                                                             | OsNAR2.1 RT_R | GCGATGGAGAAGGTGGAG        |
| 3                                                             | OsNRT1.1 RT_F | CGAGGTTGGTGCATTTTGTG      |
| 4                                                             | OsNRT1.1 RT_R | GCCGTGGTGTCTCTTTTTTTT     |
| 5                                                             | OsNRT1.2 RT_F | GCGGCGAGTCCCTGAG          |
| 6                                                             | OsNRT1.2 RT_R | CGACGGCGTAGATGAATGA       |
| 7                                                             | OsNRT2.1 RT_F | GCGACCGAGACCAGCAATAC      |
| 8                                                             | OsNRT2.1 RT_R | TTCATCACCGTTTGCAACAAG     |
| 9                                                             | OsNRT2.2 RT_F | GCCGGAGCACGCCTAAT         |
| 10                                                            | OsNRT2.2 RT_R | AAACGGTAACAAAACGTTCAACAG  |
| 11                                                            | OsAMT1.1RT_F  | GGTCATCTTCGGGTGGGTCA      |
| 12                                                            | OsAMT1.1 RT_R | CGTGCCGTGTCAGGTCCAT       |
| 13                                                            | OsAMT1.2RT_F  | GAAGCACATGCCGCAGAC        |
| 14                                                            | OsAMT1.2 RT_R | GACGCCCCGACTTGAACAGC      |
| 15                                                            | OsAMT1.3RT_F  | GCGAACGCGACGGACTA         |
| 16                                                            | OsAMT1.3RT_R  | GACCTGTGGGACCTGCTTG       |
